# Supplementary material for: Gravity wave instability structures and turbulence from more than 1.5 years of OH* airglow imager observations in Slovenia
Source: Copernicus journal article supplement (doi:10.5194/amt-14-6821-2021), 2021-10-22
Supplement: Supplementary file 1 [file amt-14-6821-2021-supplement.zip]

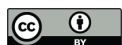

## *Supplement of*

# **Gravity wave instability structures and turbulence from more than 1.5 years of OH\* airglow imager observations in Slovenia**

**René Sedlak et al.**

*Correspondence to:* René Sedlak ([rene.sedlak@physik.uni-augsburg.de](mailto:rene.sedlak@physik.uni-augsburg.de))

- [amt-14-6821-2021-supplement-title-page.pdf](#)
- [Video1\\_FAIM03\\_2017-11-16T02.16\\_TurbulenceEpisode.avi](#)
- [Video2\\_FAIM03\\_2017-12-06T00.26\\_TurbulenceEpisode.mp4](#)
- [Video3\\_FAIM03\\_2018-10-14T17.08\\_TurbulenceEpisode.mp4](#)
- [Video4\\_FAIM03\\_2018-11-04T19.18\\_TurbulenceEpisode.mp4](#)

The copyright of individual parts of the supplement might differ from the article licence.
